# Supplementary material for: Plastome Sequences of Lygodium japonicum and Marsilea crenata Reveal the Genome Organization Transformation from Basal Ferns to Core Leptosporangiates
Source: PubMed Central journal article supplement — Genome Biol Evol. 2013 Jul 2;5(7):1403–7. doi: 10.1093/gbe/evt099 (PMC3730351; doi:10.1093/gbe/evt099), 2013-07-02
Supplement: supp_evt099_Supplementary_Fig._3.pdf [file supp_evt099_Supplementary_Fig._3.pdf]

### A. Putative intron-containing trnT-UGUs from core leptosporangiates

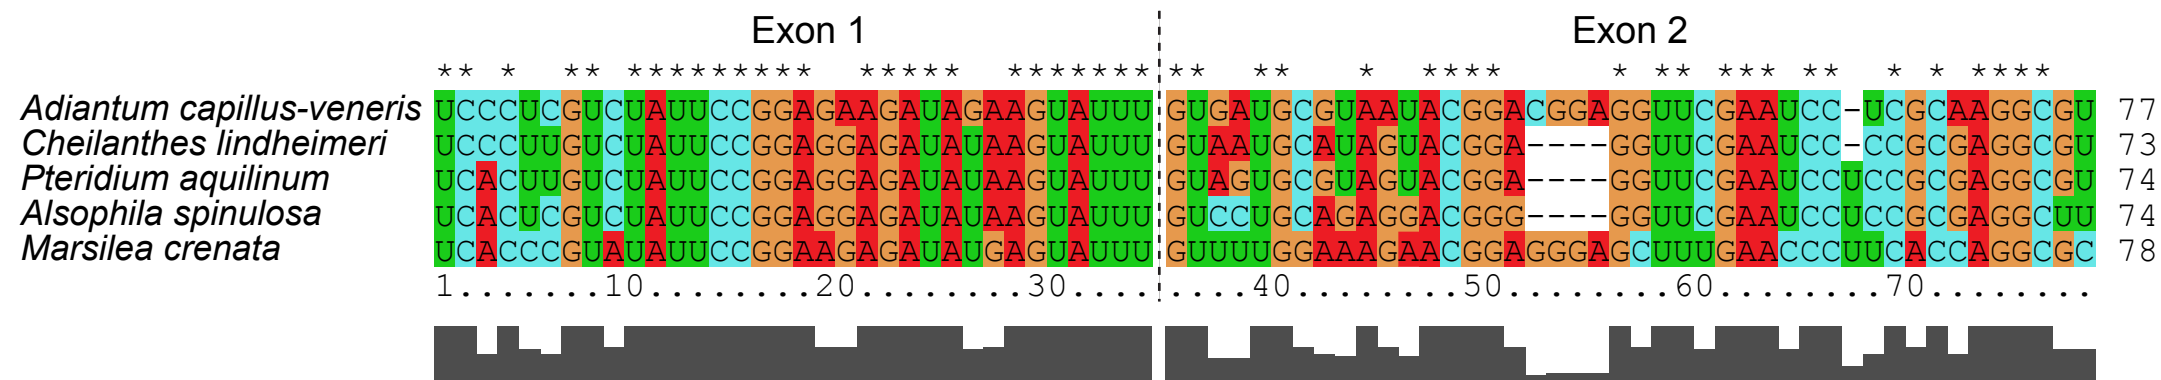

### B. Intron-free trnT-UGUs from land plants

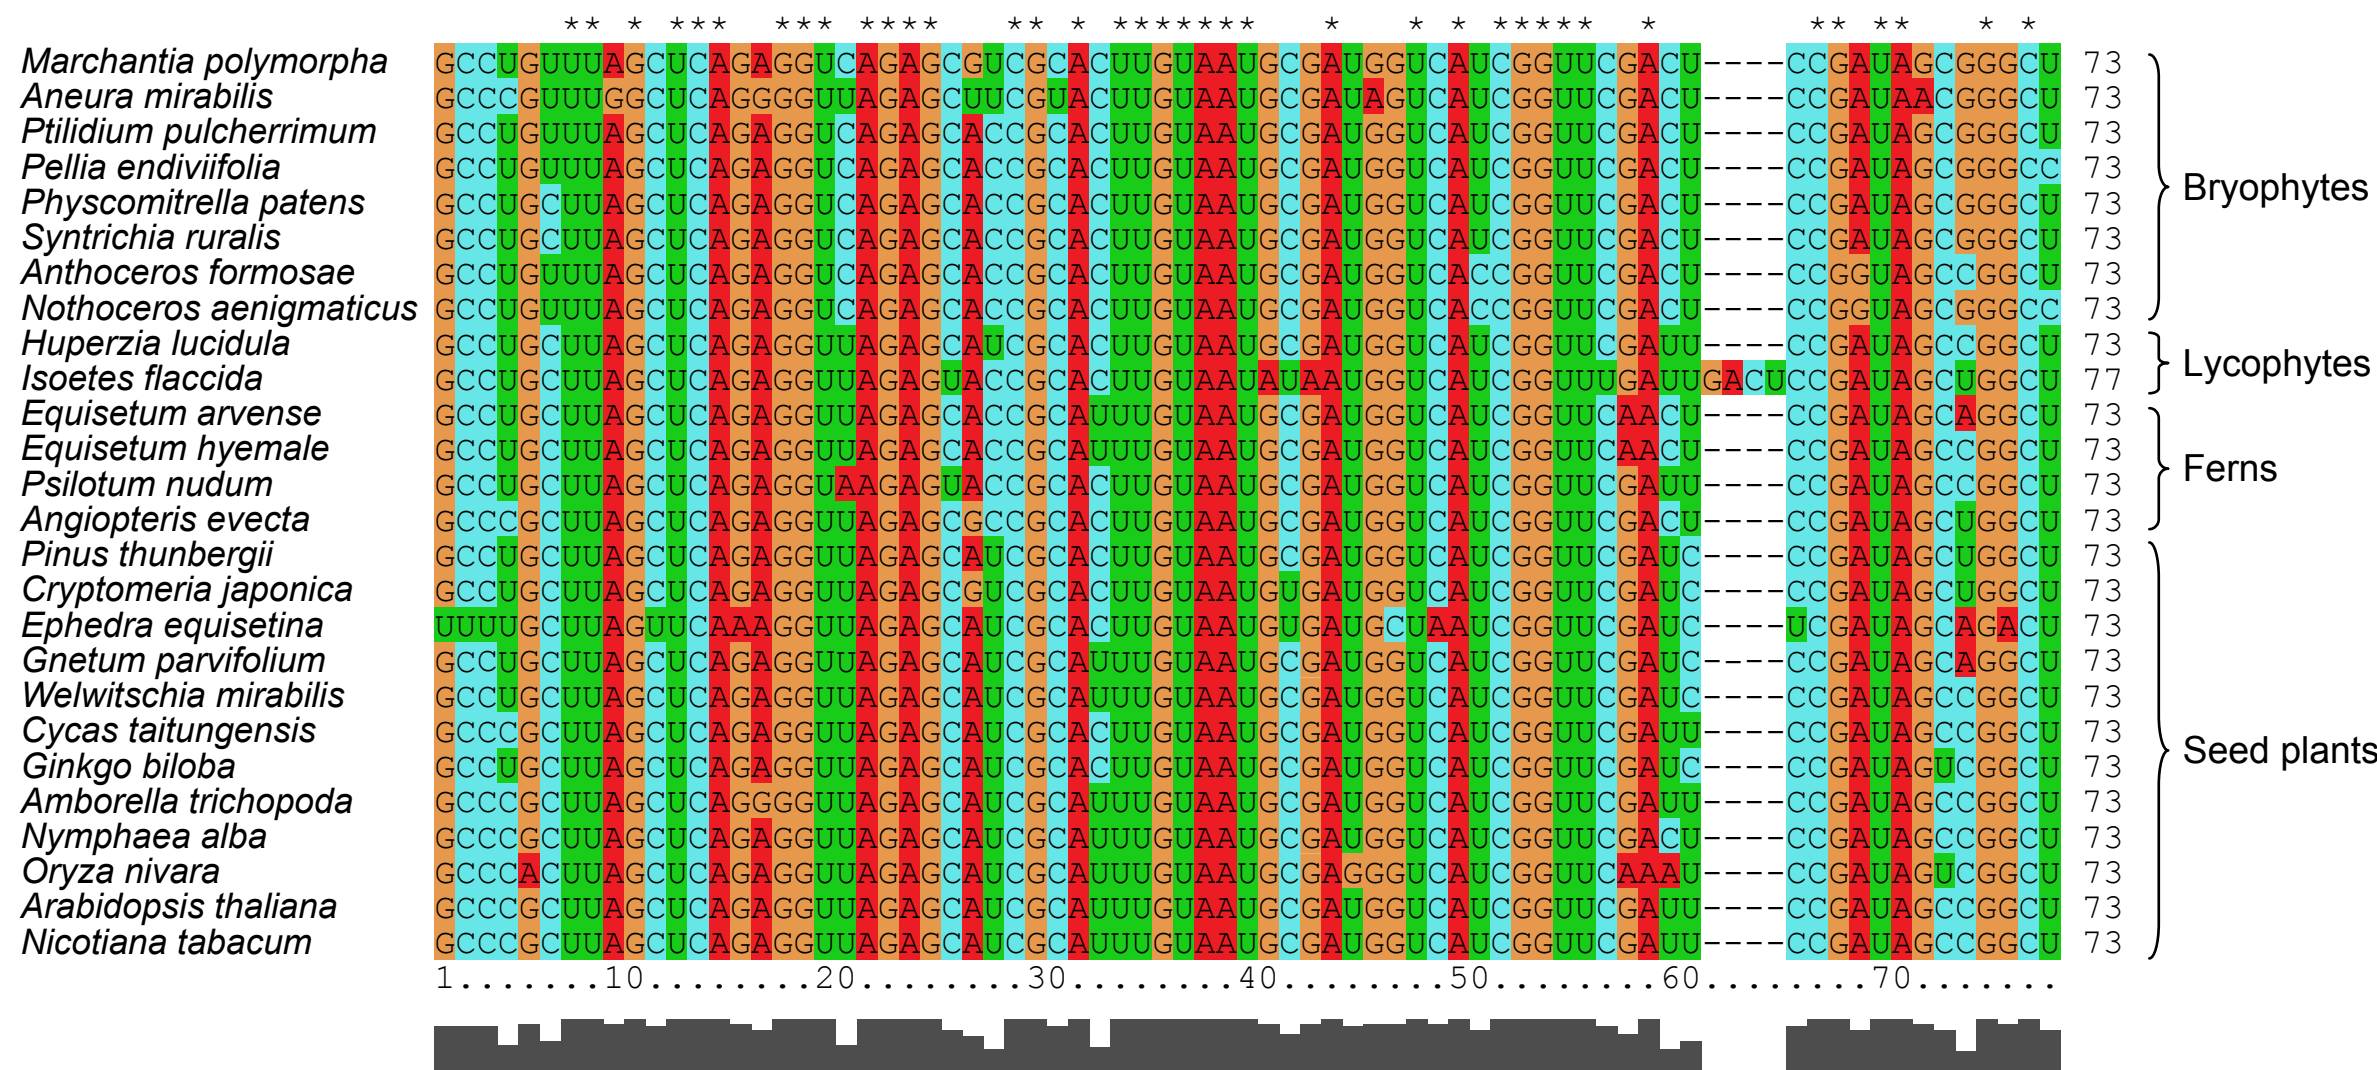

Supplementary Fig. 3. The sequences of putative intron-containing and intron-free trnT-UGUs
