# Supplementary figures and images for: Plastome Sequences of Lygodium japonicum and Marsilea crenata Reveal the Genome Organization Transformation from Basal Ferns to Core Leptosporangiates
Source: PubMed Central journal article supplement — Genome Biol Evol. 2013 Jul 2;5(7):1403–7. doi: 10.1093/gbe/evt099 (PMC3730351; doi:10.1093/gbe/evt099), 2013-07-02

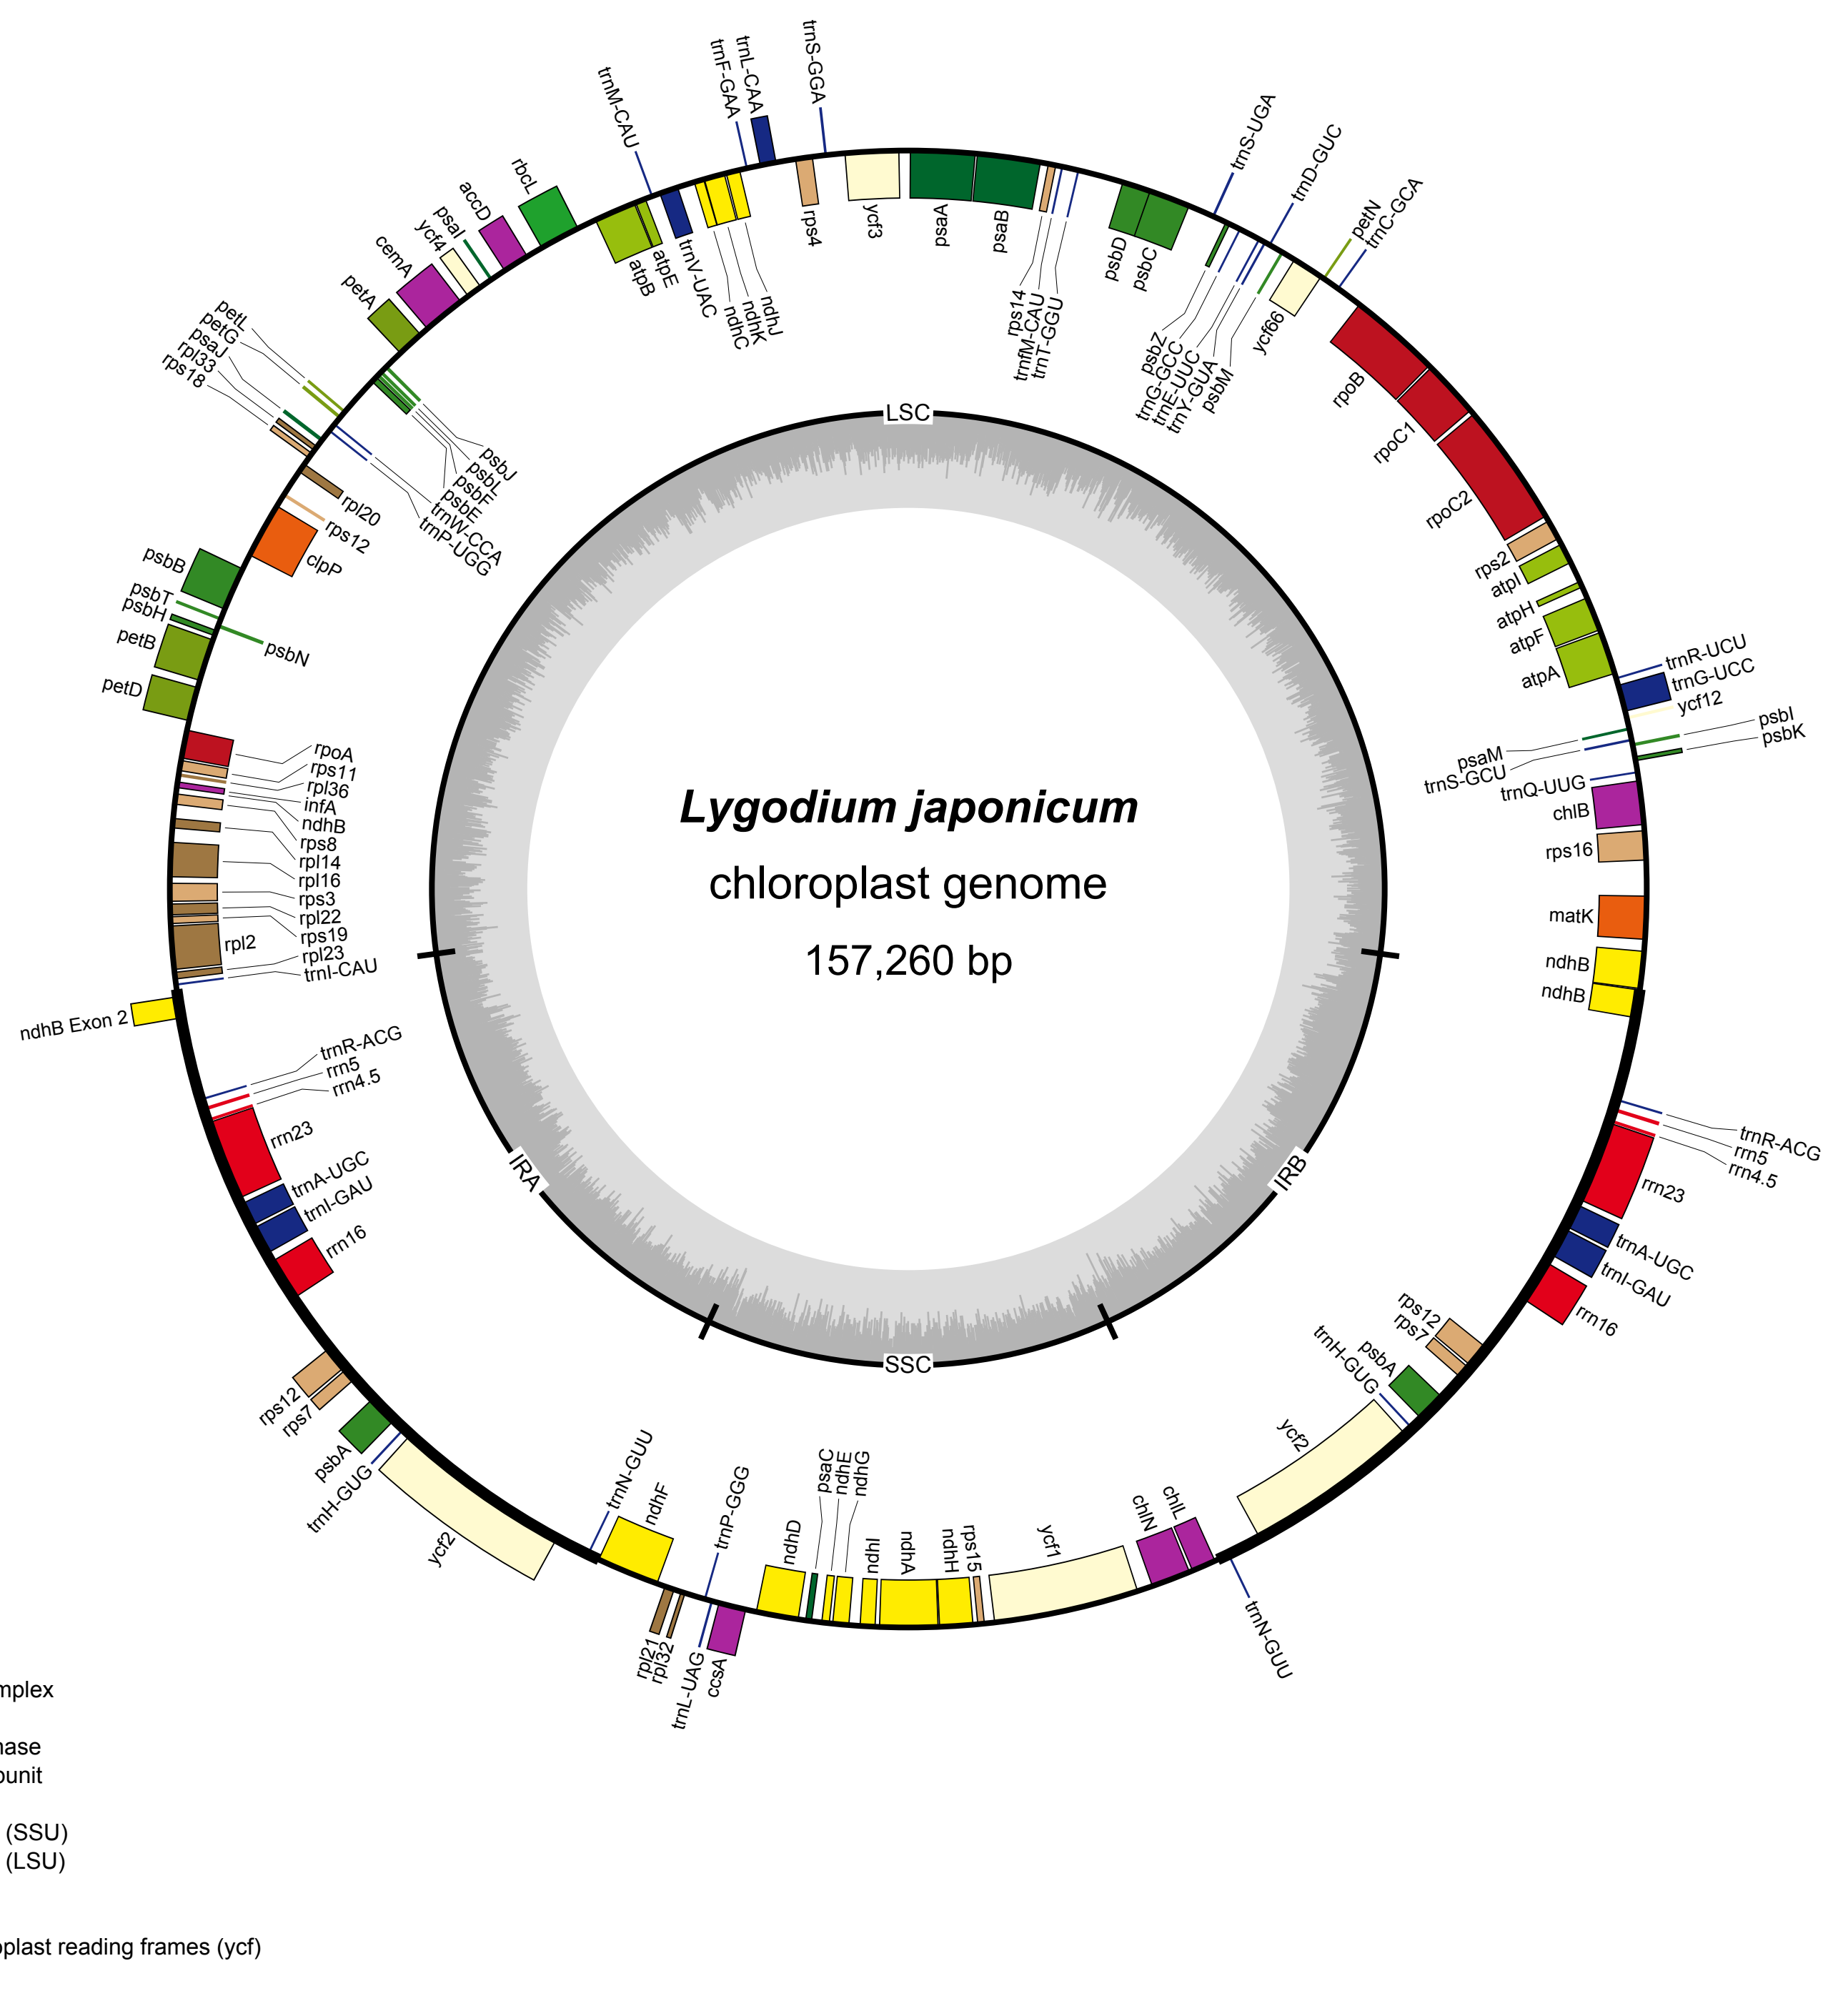

**Supplementary Fig. 1.** Gene map of the *Lygodium japonicum* chloroplast genome

Supplement: supp_evt099_Supplementary_Fig._1.pdf [file supp_evt099_Supplementary_Fig._1.pdf]
